# Supplementary material for: Air Pollution and Human Health: Investigating the Moderating Effect of the Built Environment
Source: MDPI journal article supplement (doi:10.3390/rs14153703), 2022-08-02
Supplement: s1 [file s1]

*Supplementary material for*

**Air pollution and human health: Investigating the moderating effect of built environment.**

Table of Contents

**Figure S1.** Spatial correlation of air pollution (O<sub>3</sub>, PM<sub>2.5</sub> and NO<sub>2</sub>) and mortality with built environment respectively.

**Figure S2.** Moderating effect of built environment in the relationship between air pollution and mortality in (1) unclassified area and (2) areas classified by building density and height.

**Table S1.** The percentage of H-H type grids corresponding to Figure S1.

**Table S2.** The percentage of L-L type grids corresponding to Figure S1.

**Table S3.** The percentage of L-H type grids corresponding to Figure S1.

**Table S4.** The percentage of H-L type grids corresponding to Figure S1.

**Table S5.** The percentage of not significant type grids corresponding to Figure S1.

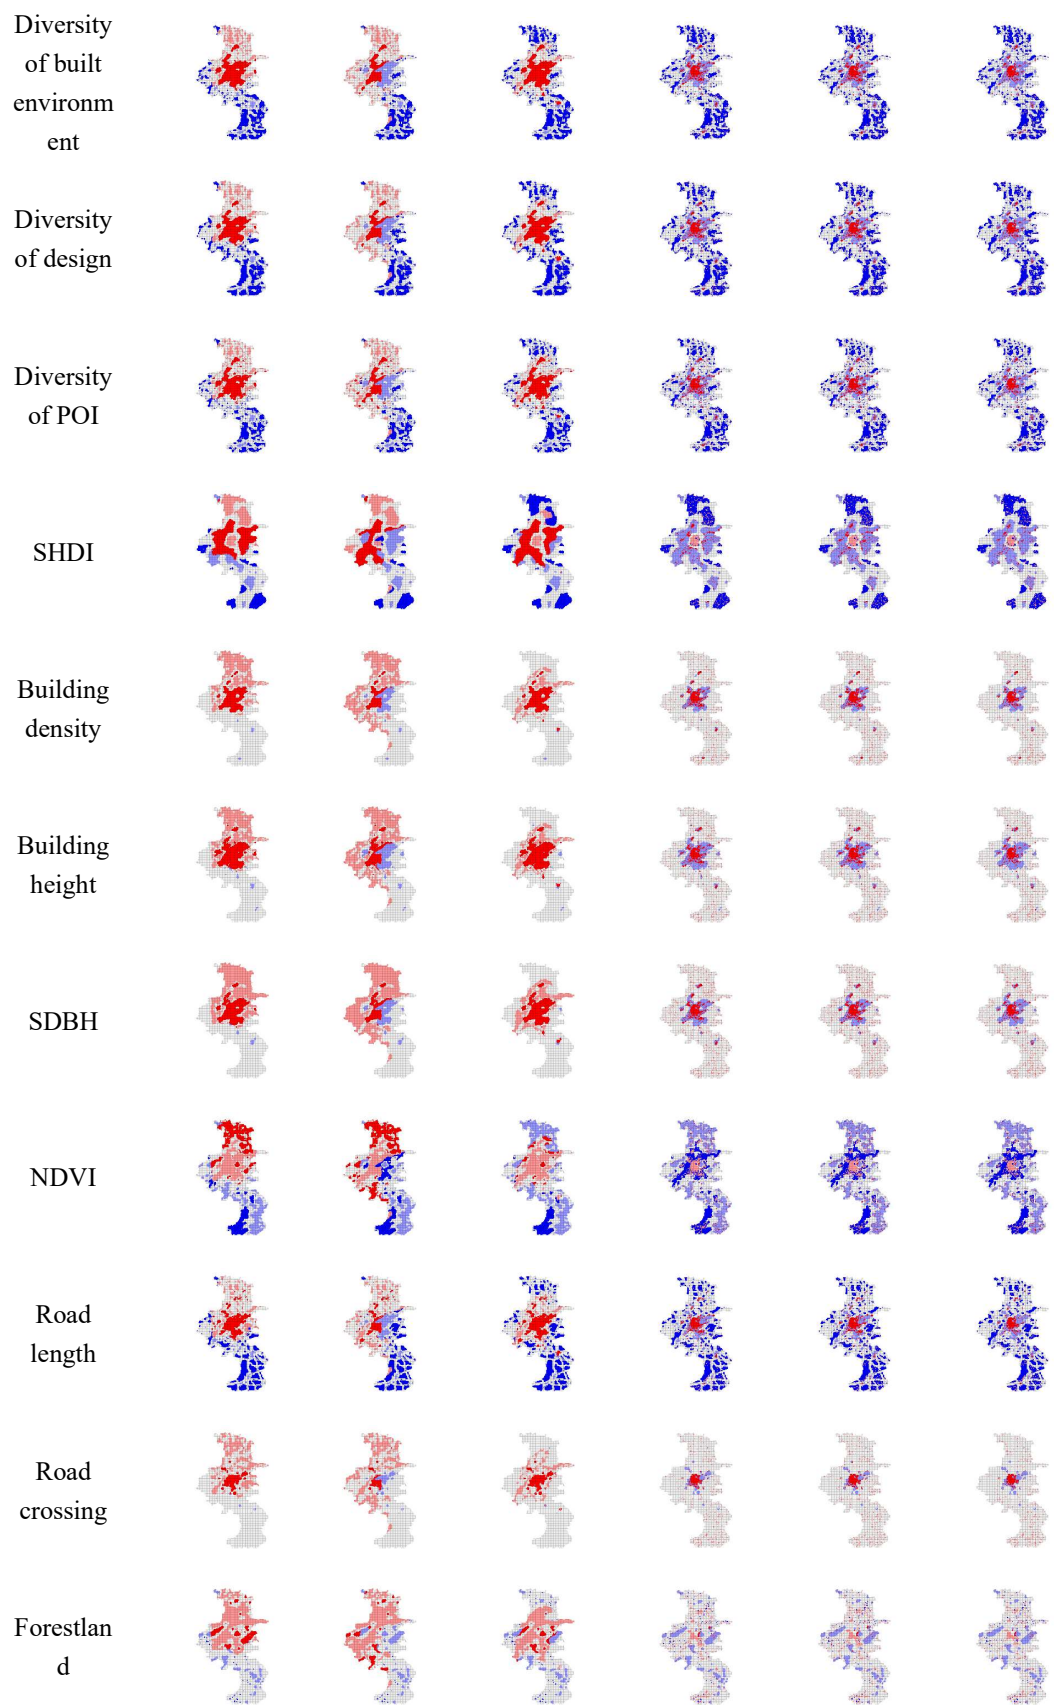

Construct  
ion land

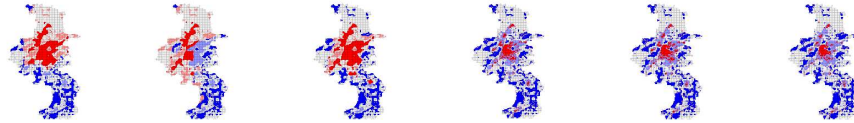

Water  
area

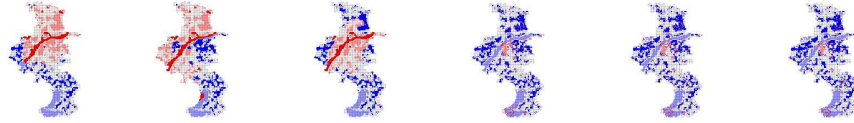

Hygiene  
facility

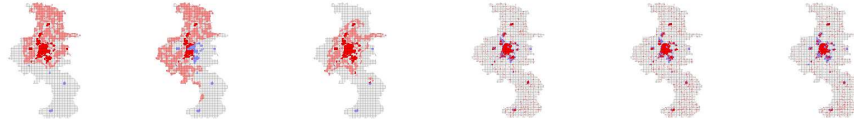

Governm  
ent  
agency

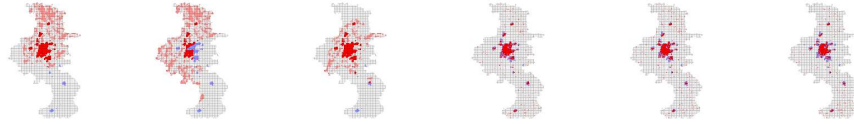

Residenti  
al  
communi  
ty

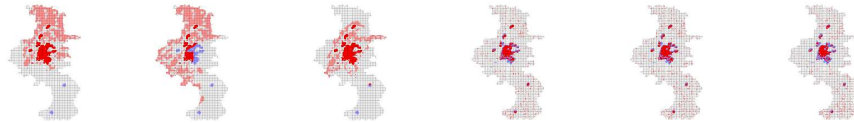

Industrial  
park

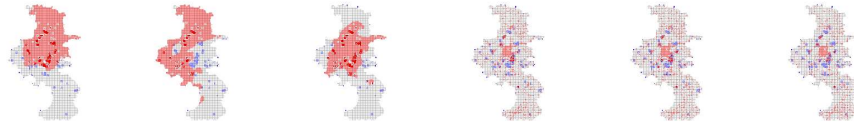

Traffic  
facilities

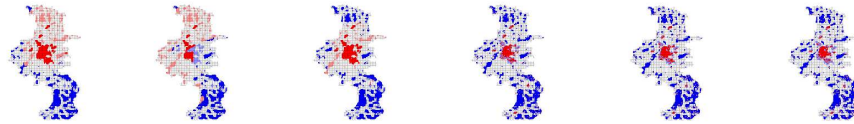

Gas  
station

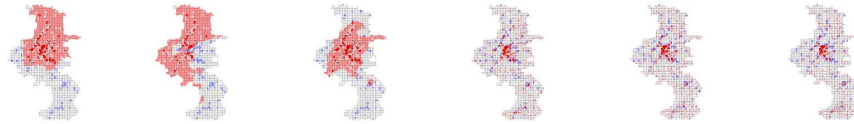

Catering  
facility

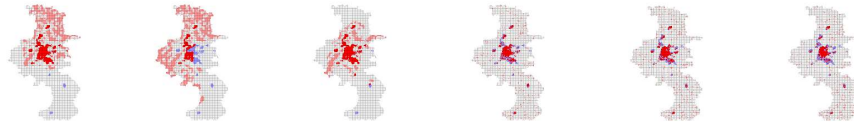

AI

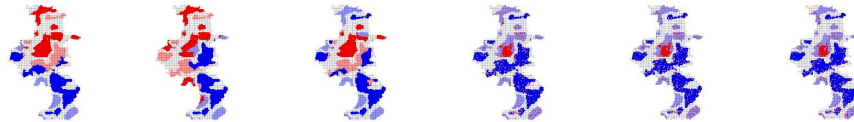

ED

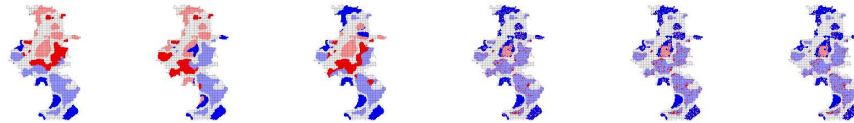

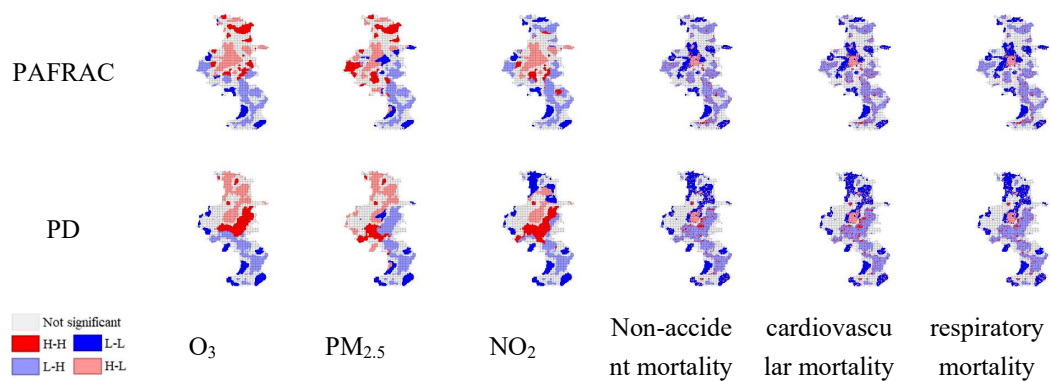

**Figure S1.** Spatial correlation of air pollution (O<sub>3</sub>, PM<sub>2.5</sub> and NO<sub>2</sub>) and mortality with built environment respectively.

## Moderating effect of built environment in the relationship between $O_3$ and mortality

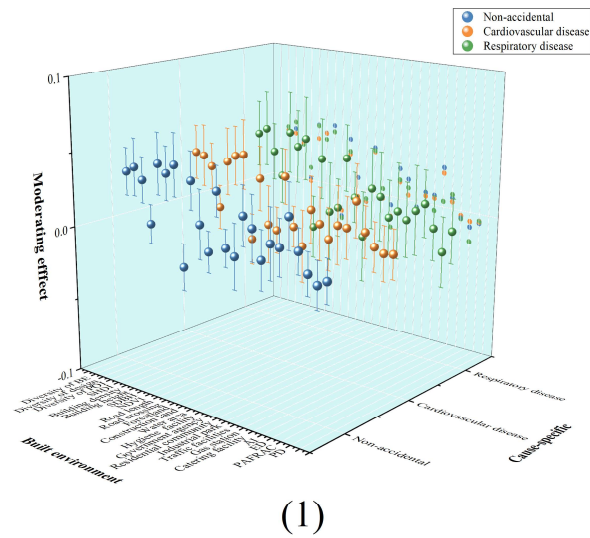

(a)

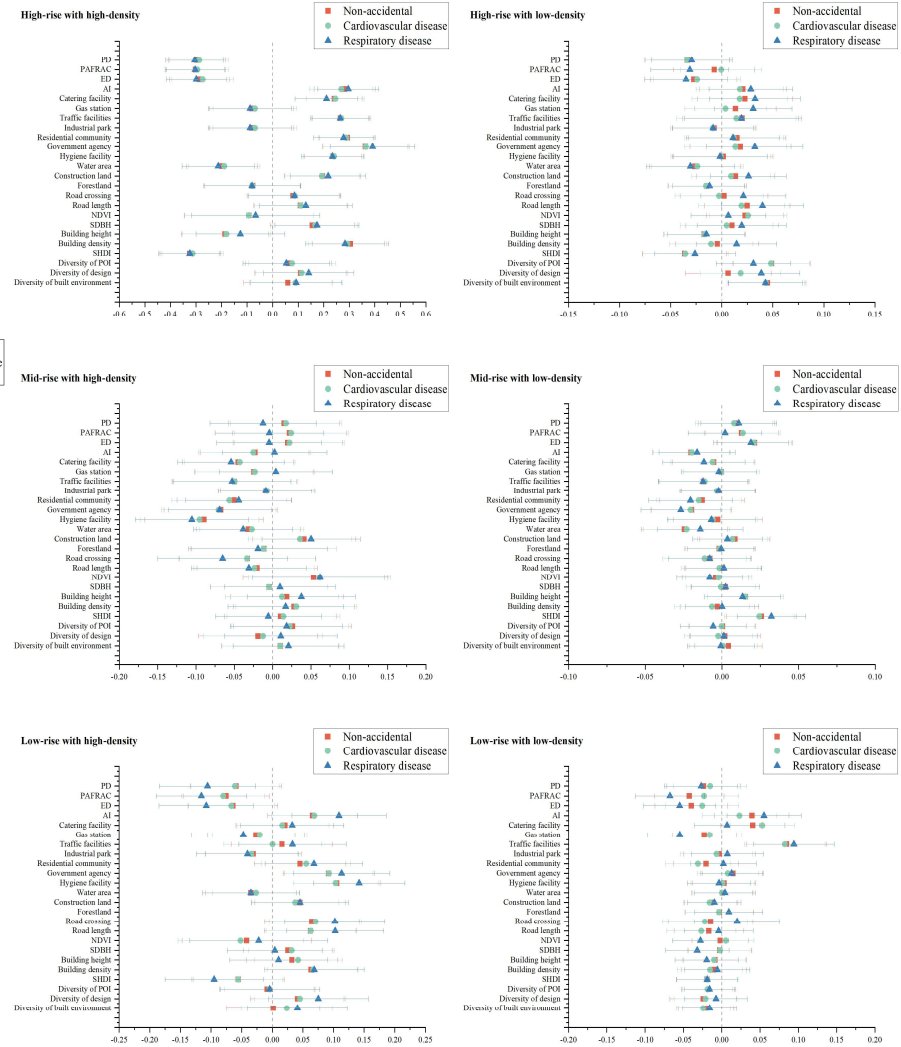

(2)

# **Moderating effect of built environment in the relationship between PM<sub>2.5</sub> and mortality**

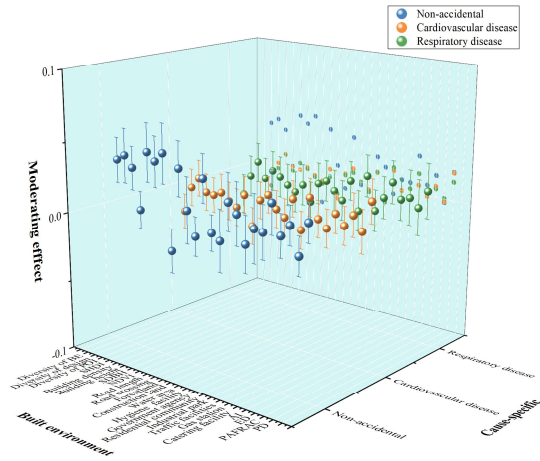

(1)

(b)

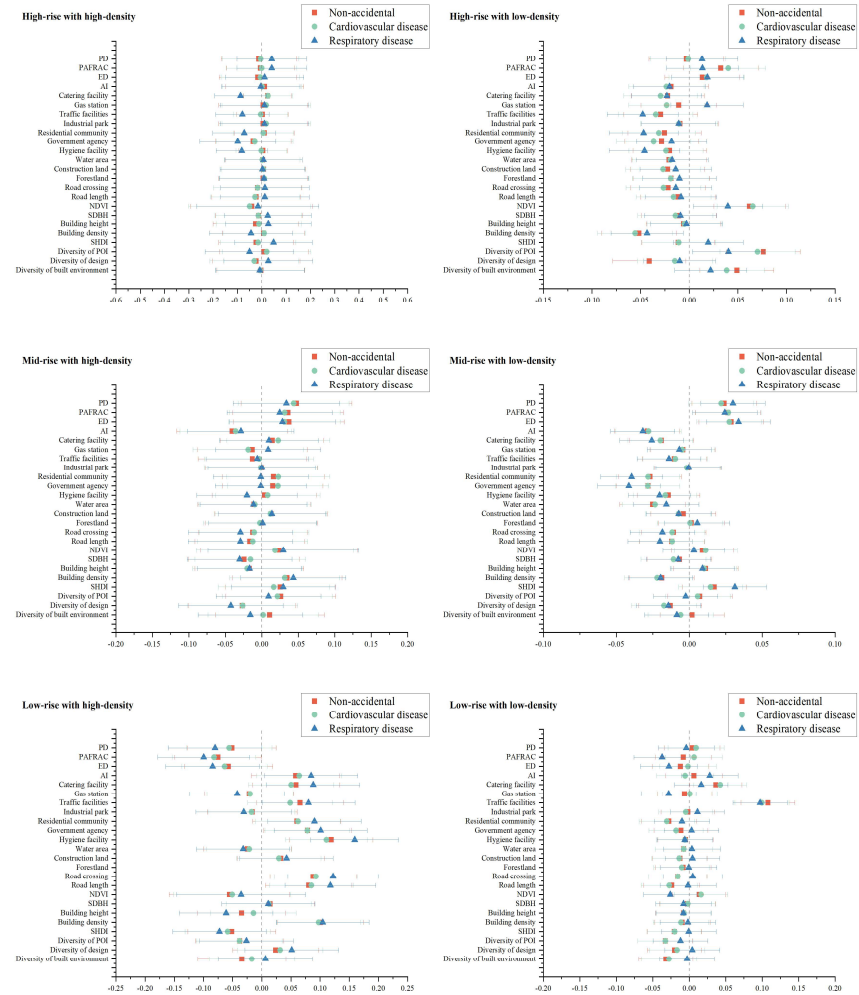

(2)

### Moderating effect of built environment in the relationship between NO<sub>2</sub> and mortality

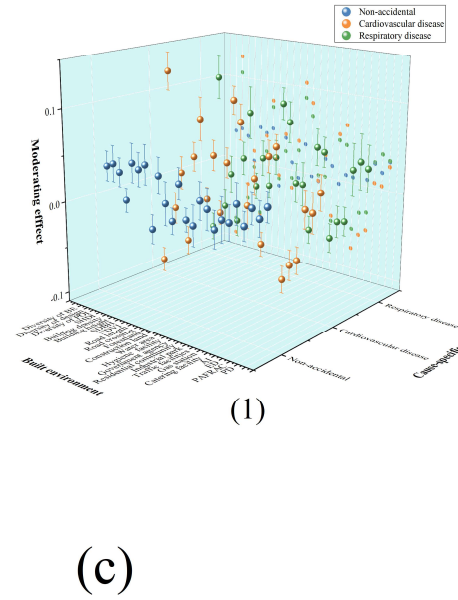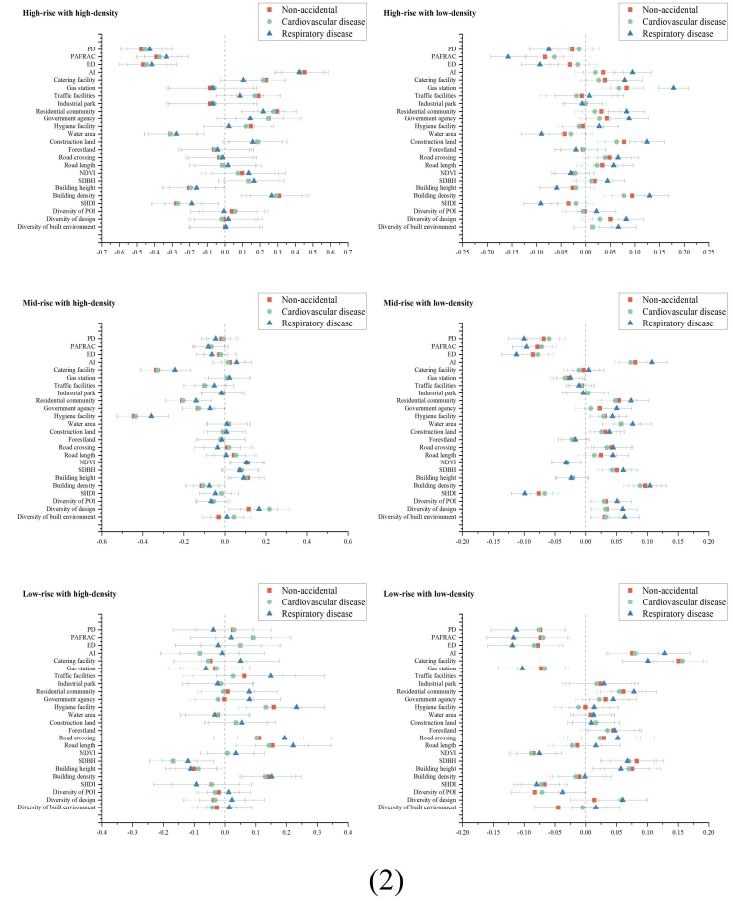

**Figure S2.** Moderating effect of built environment in the relationship between air pollution and mortality in (1) unclassified area and (2) areas classified by building density and height. (a) Moderating effect of built environment in the relationship between O<sub>3</sub> and mortality; (b) Moderating effect of built



environment in the relationship between PM<sub>2.5</sub> and mortality; (c) Moderating effect of built environment in the relationship between NO<sub>2</sub> and mortality.

**Table S1.** The percentage of H-H type grids corresponding to Figure S1.

|                                | O3     | PM2.5  | NO2    | Non-accident mortality | Cardiovascular mortality | Respiratory mortality |
|--------------------------------|--------|--------|--------|------------------------|--------------------------|-----------------------|
| Diversity of built environment | 14.85% | 7.52%  | 15.63% | 6.42%                  | 6.60%                    | 5.06%                 |
| Diversity of design            | 13.98% | 7.03%  | 14.69% | 5.94%                  | 6.02%                    | 4.73%                 |
| Diversity of POI               | 14.20% | 7.84%  | 14.84% | 6.81%                  | 7.03%                    | 5.41%                 |
| SHDI                           | 20.26% | 15.00% | 21.51% | 3.86%                  | 4.25%                    | 3.05%                 |
| Building density               | 11.10% | 5.38%  | 11.44% | 5.34%                  | 5.42%                    | 4.26%                 |
| Building height                | 15.45% | 7.74%  | 15.77% | 5.88%                  | 5.97%                    | 4.69%                 |
| SDBH                           | 13.37% | 6.62%  | 13.82% | 5.71%                  | 5.81%                    | 4.55%                 |
| NDVI                           | 15.53% | 18.38% | 3.91%  | 2.63%                  | 3.18%                    | 2.53%                 |
| Road length                    | 10.83% | 5.60%  | 11.72% | 4.96%                  | 5.10%                    | 4.01%                 |
| Road crossing                  | 6.31%  | 2.95%  | 6.43%  | 2.94%                  | 3.07%                    | 2.53%                 |
| Forestland                     | 6.46%  | 5.13%  | 3.86%  | 0.87%                  | 1.00%                    | 0.74%                 |
| Construction land              | 14.46% | 8.34%  | 16.01% | 6.27%                  | 6.42%                    | 4.99%                 |
| Water area                     | 5.53%  | 6.41%  | 5.56%  | 0.98%                  | 1.04%                    | 0.89%                 |
| Hygiene facility               | 6.02%  | 3.38%  | 6.08%  | 4.28%                  | 4.35%                    | 3.60%                 |
| Government agency              | 5.71%  | 3.22%  | 5.90%  | 4.13%                  | 4.12%                    | 3.55%                 |
| Residential community          | 7.00%  | 3.82%  | 7.14%  | 4.69%                  | 4.74%                    | 3.95%                 |
| Industrial park                | 3.11%  | 1.82%  | 3.45%  | 1.07%                  | 1.20%                    | 0.86%                 |
| Traffic facilities             | 6.58%  | 3.37%  | 6.53%  | 4.22%                  | 4.17%                    | 3.62%                 |
| Gas station                    | 4.07%  | 2.70%  | 4.15%  | 2.22%                  | 2.22%                    | 1.88%                 |
| Catering facility              | 6.59%  | 3.38%  | 6.73%  | 4.34%                  | 4.41%                    | 3.60%                 |
| AI                             | 15.29% | 15.80% | 10.01% | 4.76%                  | 4.98%                    | 4.20%                 |
| ED                             | 10.71% | 10.39% | 10.89% | 3.67%                  | 4.29%                    | 3.32%                 |



|        |        |        |        |       |       |       |
|--------|--------|--------|--------|-------|-------|-------|
| PAFRAC | 10.07% | 12.76% | 5.01%  | 3.28% | 3.81% | 3.13% |
| PD     | 11.53% | 7.67%  | 12.47% | 3.78% | 4.36% | 3.32% |

**Table S2.** The percentage of L-L type grids corresponding to Figure S1.

|                                | O3     | PM2.5  | NO2    | Non-accident mortality | Cardiovascular mortality | Respiratory mortality |
|--------------------------------|--------|--------|--------|------------------------|--------------------------|-----------------------|
| Diversity of built environment | 17.40% | 14.64% | 23.57% | 25.22%                 | 24.84%                   | 25.04%                |
| Diversity of design            | 19.62% | 16.46% | 25.28% | 26.89%                 | 26.37%                   | 26.67%                |
| Diversity of POI               | 13.59% | 11.72% | 17.51% | 19.51%                 | 19.23%                   | 19.38%                |
| SHDI                           | 10.09% | 8.51%  | 19.77% | 19.45%                 | 19.17%                   | 19.68%                |
| Building density               | 0.00%  | 0.00%  | 0.00%  | 0.00%                  | 0.00%                    | 0.00%                 |
| Building height                | 0.00%  | 0.00%  | 0.00%  | 0.00%                  | 0.00%                    | 0.00%                 |
| SDBH                           | 0.00%  | 0.00%  | 0.00%  | 0.00%                  | 0.00%                    | 0.00%                 |
| NDVI                           | 8.54%  | 12.30% | 7.44%  | 17.87%                 | 17.76%                   | 18.81%                |
| Road length                    | 17.50% | 15.63% | 21.47% | 24.20%                 | 23.85%                   | 24.01%                |
| Road crossing                  | 0.00%  | 0.00%  | 0.00%  | 0.00%                  | 0.00%                    | 0.00%                 |
| Forestland                     | 0.49%  | 0.45%  | 0.66%  | 1.05%                  | 1.06%                    | 1.07%                 |
| Construction land              | 17.27% | 14.50% | 20.38% | 24.06%                 | 23.86%                   | 24.06%                |
| Water area                     | 10.04% | 11.72% | 14.40% | 20.48%                 | 20.05%                   | 21.17%                |
| Hygiene facility               | 0.00%  | 0.00%  | 0.00%  | 0.00%                  | 0.00%                    | 0.00%                 |
| Government agency              | 0.00%  | 0.00%  | 0.00%  | 0.00%                  | 0.00%                    | 0.00%                 |
| Residential community          | 0.00%  | 0.00%  | 0.00%  | 0.00%                  | 0.00%                    | 0.00%                 |
| Industrial park                | 0.12%  | 0.06%  | 0.17%  | 0.20%                  | 0.20%                    | 0.20%                 |
| Traffic facilities             | 15.21% | 13.44% | 18.80% | 21.33%                 | 20.98%                   | 21.04%                |
| Gas station                    | 0.00%  | 0.00%  | 0.02%  | 0.02%                  | 0.02%                    | 0.02%                 |
| Catering facility              | 0.00%  | 0.00%  | 0.00%  | 0.00%                  | 0.00%                    | 0.00%                 |
| AI                             | 19.87% | 19.73% | 20.64% | 26.66%                 | 26.08%                   | 26.90%                |

|        |       |       |        |        |        |        |
|--------|-------|-------|--------|--------|--------|--------|
| ED     | 8.51% | 7.75% | 14.43% | 17.94% | 17.65% | 18.40% |
| PAFRAC | 6.58% | 7.48% | 8.37%  | 16.53% | 16.35% | 17.16% |
| PD     | 9.82% | 7.61% | 17.62% | 21.05% | 20.74% | 21.45% |

**Table S3.** The percentage of L-H type grids corresponding to Figure S1.

|                                | O3     | PM2.5  | NO2    | Non-accident mortality | Cardiovascular mortality | Respiratory mortality |
|--------------------------------|--------|--------|--------|------------------------|--------------------------|-----------------------|
| Diversity of built environment | 1.95%  | 9.29%  | 1.18%  | 10.39%                 | 10.21%                   | 11.75%                |
| Diversity of design            | 1.23%  | 8.18%  | 0.52%  | 9.27%                  | 9.20%                    | 10.48%                |
| Diversity of POI               | 2.98%  | 9.34%  | 2.33%  | 10.36%                 | 10.15%                   | 11.77%                |
| SHDI                           | 9.98%  | 15.25% | 8.73%  | 26.38%                 | 25.99%                   | 27.19%                |
| Building density               | 0.54%  | 6.25%  | 0.20%  | 6.30%                  | 6.22%                    | 7.37%                 |
| Building height                | 1.00%  | 8.71%  | 0.68%  | 10.57%                 | 10.48%                   | 11.76%                |
| SDBH                           | 0.81%  | 7.55%  | 0.36%  | 8.47%                  | 8.36%                    | 9.62%                 |
| NDVI                           | 15.99% | 13.03% | 27.66% | 28.95%                 | 28.37%                   | 29.03%                |
| Road length                    | 1.87%  | 7.10%  | 0.98%  | 7.74%                  | 7.60%                    | 8.68%                 |
| Road crossing                  | 0.26%  | 3.63%  | 0.13%  | 3.66%                  | 3.53%                    | 4.07%                 |
| Forestland                     | 6.65%  | 7.97%  | 9.24%  | 12.23%                 | 12.10%                   | 12.36%                |
| Construction land              | 2.93%  | 9.05%  | 1.38%  | 11.13%                 | 10.97%                   | 12.40%                |
| Water area                     | 7.72%  | 6.84%  | 7.68%  | 12.27%                 | 12.21%                   | 12.35%                |
| Hygiene facility               | 0.50%  | 3.20%  | 0.42%  | 2.31%                  | 2.24%                    | 3.03%                 |
| Government agency              | 0.69%  | 3.29%  | 0.51%  | 2.36%                  | 2.39%                    | 2.97%                 |
| Residential community          | 0.50%  | 3.69%  | 0.36%  | 2.85%                  | 2.80%                    | 3.72%                 |
| Industrial park                | 1.93%  | 3.32%  | 1.37%  | 4.41%                  | 4.26%                    | 5.25%                 |
| Traffic facilities             | 0.38%  | 3.59%  | 0.43%  | 2.74%                  | 2.79%                    | 3.34%                 |
| Gas station                    | 2.91%  | 4.22%  | 3.09%  | 5.85%                  | 5.81%                    | 6.19%                 |
| Catering facility              | 0.50%  | 3.20%  | 0.36%  | 2.78%                  | 2.70%                    | 3.50%                 |

|        |        |        |        |        |        |        |
|--------|--------|--------|--------|--------|--------|--------|
| AI     | 8.11%  | 7.61%  | 13.40% | 18.64% | 18.43% | 19.20% |
| ED     | 20.30% | 20.62% | 20.13% | 27.35% | 26.72% | 27.70% |
| PAFRAC | 20.20% | 17.51% | 25.25% | 26.99% | 26.46% | 27.14% |
| PD     | 15.38% | 19.24% | 14.44% | 23.13% | 22.55% | 23.57% |

**Table S4.** The percentage of H-L type grids corresponding to Figure S1.

|                                | O3     | PM2.5  | NO2    | Non-accident mortality | Cardiovascular mortality | Respiratory mortality |
|--------------------------------|--------|--------|--------|------------------------|--------------------------|-----------------------|
| Diversity of built environment | 9.27%  | 12.03% | 3.10%  | 1.45%                  | 1.83%                    | 1.63%                 |
| Diversity of design            | 9.43%  | 12.72% | 3.69%  | 2.08%                  | 2.61%                    | 2.28%                 |
| Diversity of POI               | 8.70%  | 11.26% | 3.82%  | 1.32%                  | 1.69%                    | 1.39%                 |
| SHDI                           | 13.70% | 15.28% | 4.01%  | 4.34%                  | 4.62%                    | 4.11%                 |
| Building density               | 21.97% | 30.90% | 9.23%  | 4.84%                  | 5.82%                    | 4.79%                 |
| Building height                | 22.18% | 31.26% | 9.37%  | 4.87%                  | 5.90%                    | 4.79%                 |
| SDBH                           | 28.55% | 38.48% | 13.81% | 6.61%                  | 7.72%                    | 6.37%                 |
| NDVI                           | 15.25% | 11.46% | 16.35% | 5.90%                  | 5.99%                    | 4.93%                 |
| Road length                    | 8.51%  | 10.55% | 4.48%  | 1.72%                  | 2.08%                    | 1.88%                 |
| Road crossing                  | 18.90% | 22.45% | 8.95%  | 4.16%                  | 4.96%                    | 4.29%                 |
| Forestland                     | 26.55% | 29.37% | 21.64% | 7.62%                  | 8.00%                    | 6.43%                 |
| Construction land              | 8.16%  | 10.94% | 5.05%  | 1.37%                  | 1.57%                    | 1.37%                 |
| Water area                     | 15.80% | 14.44% | 11.04% | 4.88%                  | 5.32%                    | 4.18%                 |
| Hygiene facility               | 27.37% | 34.38% | 16.37% | 5.00%                  | 5.99%                    | 4.86%                 |
| Government agency              | 14.63% | 19.85% | 7.84%  | 1.93%                  | 2.39%                    | 1.93%                 |
| Residential community          | 23.82% | 30.04% | 11.49% | 4.43%                  | 5.31%                    | 4.38%                 |
| Industrial park                | 43.48% | 46.68% | 29.95% | 11.91%                 | 13.10%                   | 10.83%                |
| Traffic facilities             | 8.98%  | 11.49% | 4.37%  | 1.48%                  | 1.92%                    | 1.75%                 |
| Gas station                    | 38.02% | 42.14% | 25.61% | 8.77%                  | 9.96%                    | 7.89%                 |

|                   |        |        |        |       |       |       |
|-------------------|--------|--------|--------|-------|-------|-------|
| Catering facility | 18.70% | 34.38% | 9.03%  | 3.49% | 4.30% | 3.38% |
| AI                | 10.20% | 10.34% | 9.42%  | 3.41% | 3.99% | 3.17% |
| ED                | 14.13% | 14.88% | 8.20%  | 4.69% | 4.98% | 4.23% |
| PAFRAC            | 14.53% | 13.63% | 12.73% | 4.57% | 4.75% | 3.94% |
| PD                | 16.20% | 18.40% | 8.37%  | 4.93% | 5.24% | 4.53% |

**Table S5.** The percentage of not significant type grids corresponding to Figure S1.

|                                | O3     | PM2.5  | NO2    | Non-accident mortality | Cardiovascular mortality | Respiratory mortality |
|--------------------------------|--------|--------|--------|------------------------|--------------------------|-----------------------|
| Diversity of built environment | 56.52% | 56.52% | 56.52% | 56.52%                 | 56.52%                   | 56.52%                |
| Diversity of design            | 55.74% | 55.60% | 55.82% | 55.82%                 | 55.81%                   | 55.84%                |
| Diversity of POI               | 60.54% | 59.85% | 61.49% | 61.99%                 | 61.91%                   | 62.05%                |
| SHDI                           | 45.97% | 45.97% | 45.97% | 45.97%                 | 45.97%                   | 45.97%                |
| Building density               | 66.40% | 57.46% | 79.13% | 83.53%                 | 82.54%                   | 83.57%                |
| Building height                | 61.37% | 52.29% | 74.18% | 78.68%                 | 77.65%                   | 78.76%                |
| SDBH                           | 57.27% | 47.35% | 72.02% | 79.21%                 | 78.11%                   | 79.45%                |
| NDVI                           | 44.69% | 44.82% | 44.63% | 44.66%                 | 44.69%                   | 44.71%                |
| Road length                    | 61.30% | 61.12% | 61.36% | 61.38%                 | 61.37%                   | 61.41%                |
| Road crossing                  | 74.52% | 70.96% | 84.49% | 89.24%                 | 88.45%                   | 89.11%                |
| Forestland                     | 59.86% | 57.07% | 64.60% | 78.23%                 | 77.83%                   | 79.39%                |
| Construction land              | 57.18% | 57.18% | 57.18% | 57.18%                 | 57.18%                   | 57.18%                |
| Water area                     | 60.92% | 60.60% | 61.31% | 61.39%                 | 61.38%                   | 61.41%                |
| Hygiene facility               | 66.11% | 59.04% | 77.14% | 88.41%                 | 87.42%                   | 88.52%                |
| Government agency              | 78.98% | 73.65% | 85.75% | 91.58%                 | 91.09%                   | 91.55%                |
| Residential community          | 68.67% | 62.44% | 81.01% | 88.03%                 | 87.15%                   | 87.95%                |
| Industrial park                | 51.36% | 48.11% | 65.06% | 82.41%                 | 81.23%                   | 82.86%                |
| Traffic facilities             | 68.85% | 68.11% | 69.87% | 70.23%                 | 70.15%                   | 70.26%                |

|                   |        |        |        |        |        |        |
|-------------------|--------|--------|--------|--------|--------|--------|
| Gas station       | 55.00% | 50.94% | 67.14% | 83.14% | 81.99% | 84.01% |
| Catering facility | 74.21% | 59.04% | 83.88% | 89.40% | 88.59% | 89.52% |
| AI                | 46.53% | 46.53% | 46.53% | 46.53% | 46.53% | 46.53% |
| ED                | 46.36% | 46.36% | 46.36% | 46.35% | 46.36% | 46.35% |
| PAFRAC            | 48.62% | 48.62% | 48.62% | 48.62% | 48.62% | 48.62% |
| PD                | 47.08% | 47.08% | 47.10% | 47.11% | 47.11% | 47.12% |

---
