# Supplementary material for: Air Pollution and Human Health: Investigating the Moderating Effect of the Built Environment
Source: MDPI journal article supplement (doi:10.3390/rs14153703), 2022-08-02
Supplement: s1 [file s1]

Archive with 1 entries (1 files):
- remotesensing-1790381-supplementary.pdf
